# Supplementary material
Source: PubMed Central journal article supplement (PMC5533578)
Supplement: NIHMS882448-supplement-s1.pdf [file NIHMS882448-supplement-s1.pdf]

Figure S1

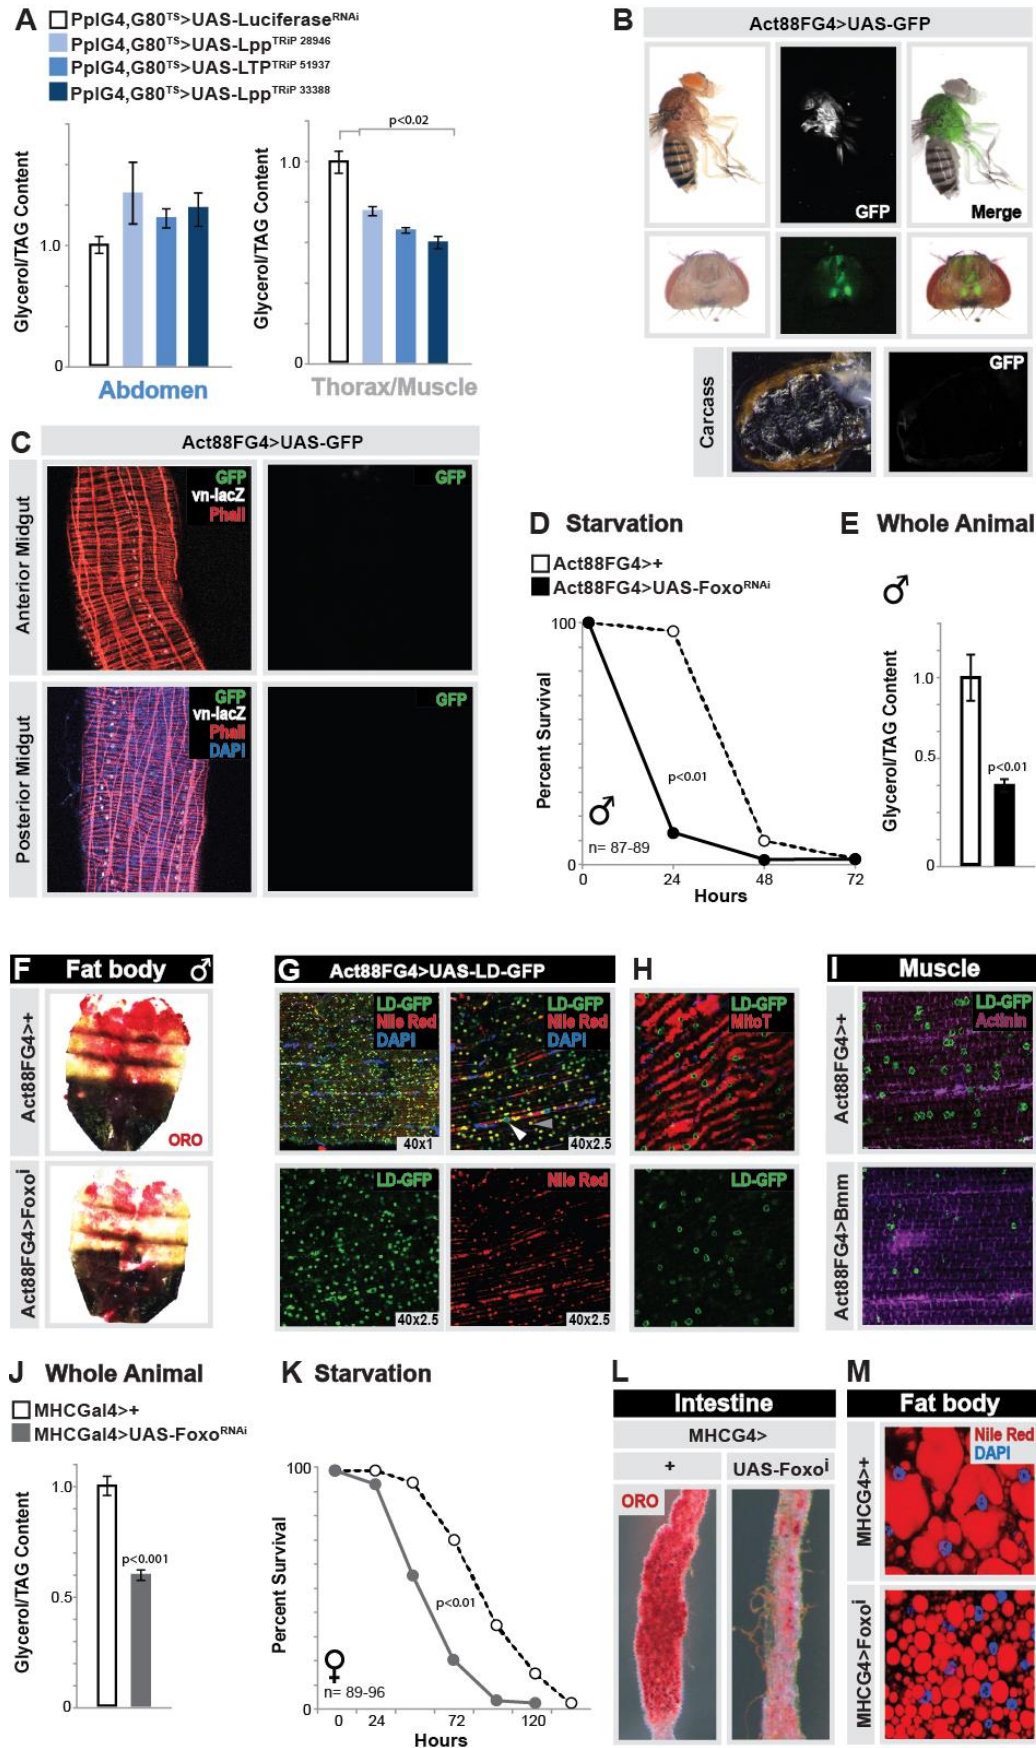

Figure S2

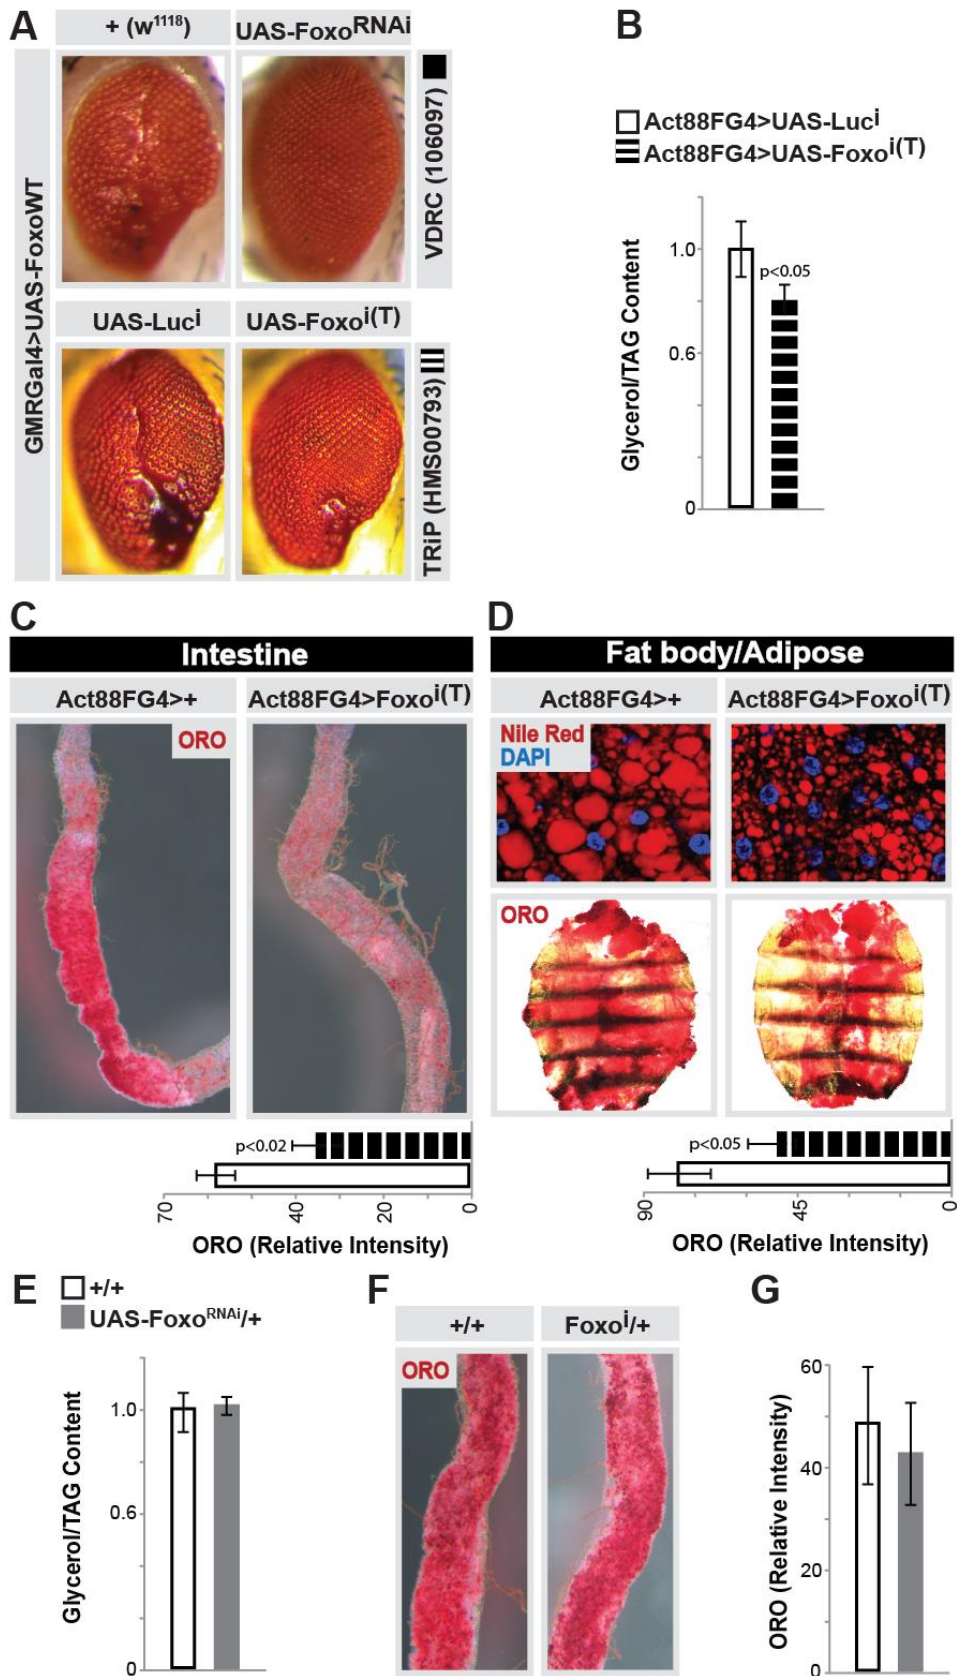

Figure S3

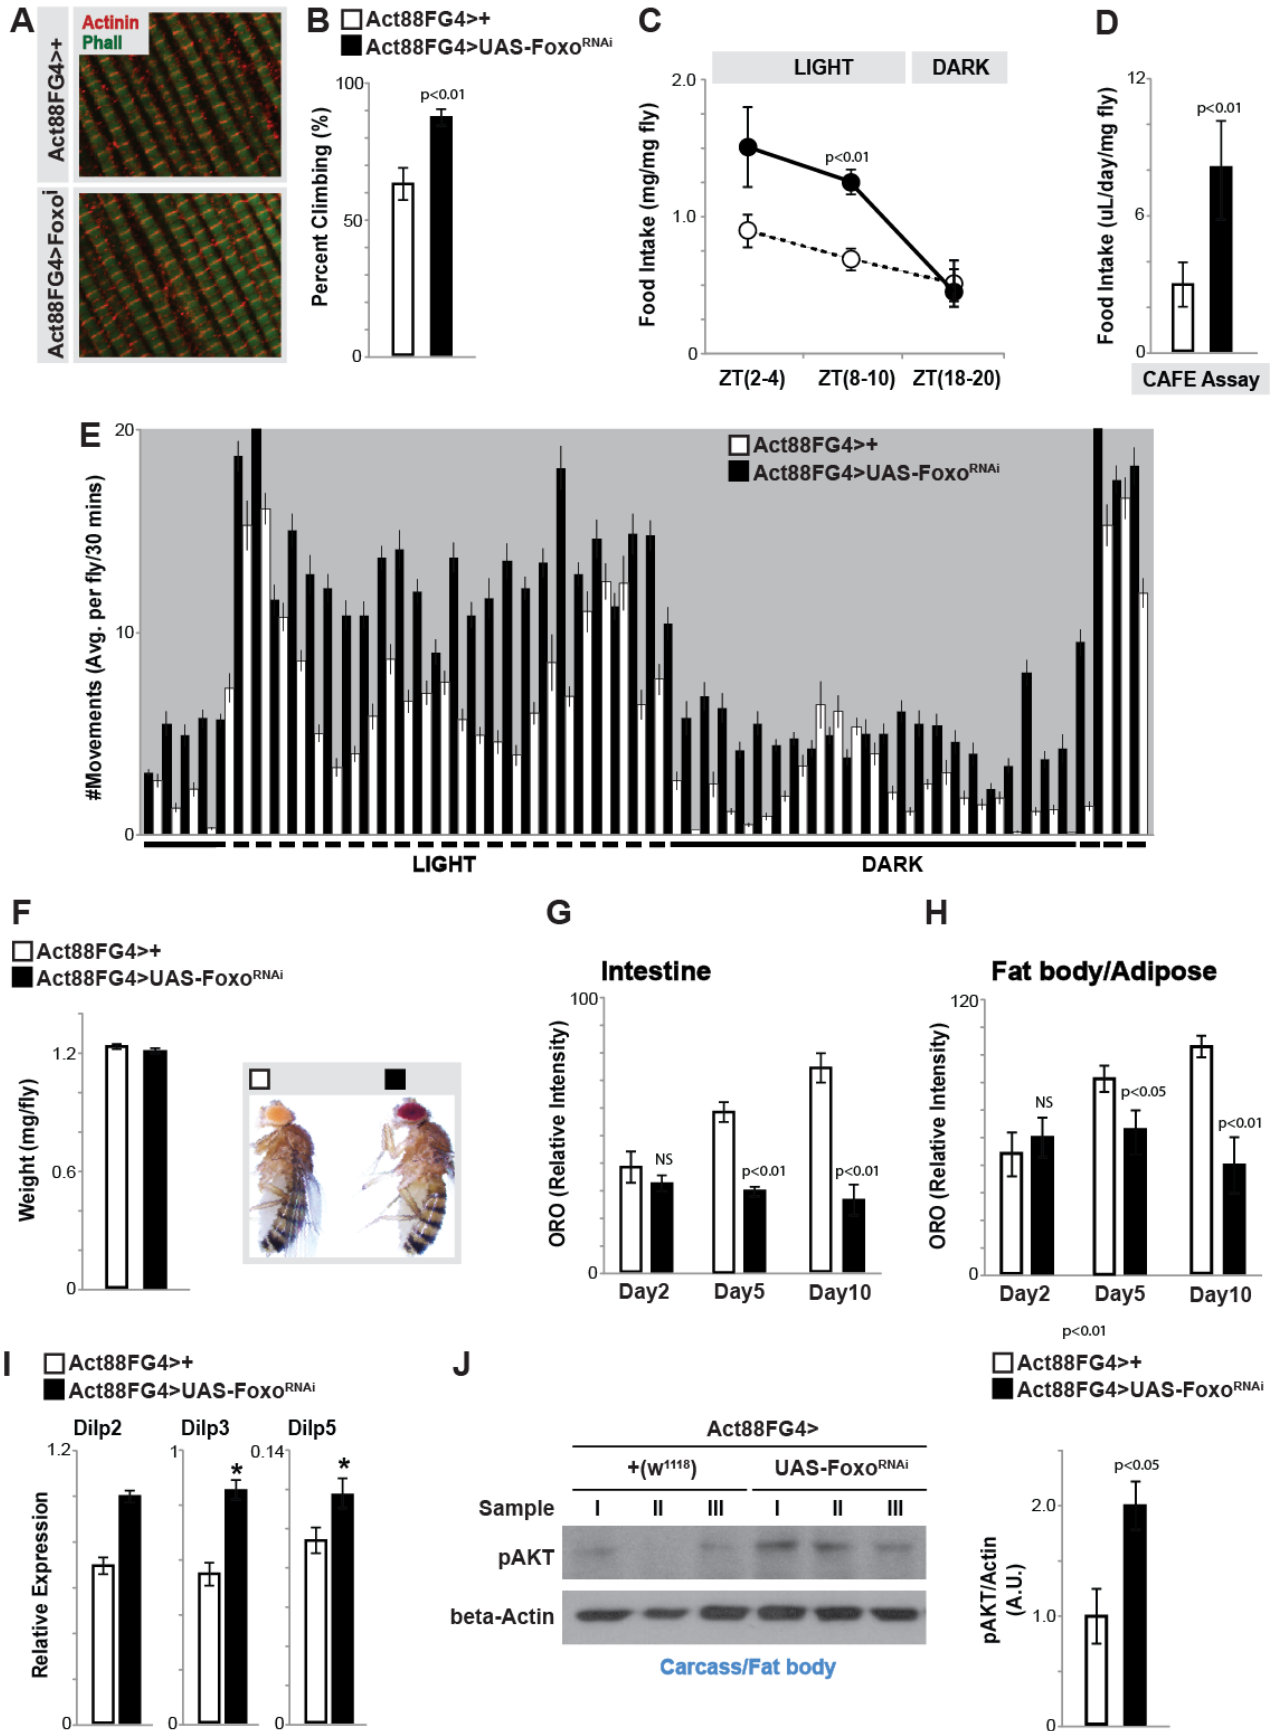

Figure S4

**A**

| Gene Name | RPKM Values            |           |                      |           |                        |                  |
|-----------|------------------------|-----------|----------------------|-----------|------------------------|------------------|
|           | Act88FG4>              |           |                      |           |                        |                  |
|           | + (w <sup>1118</sup> ) |           | Foxo <sup>RNAi</sup> |           | + (w <sup>1118</sup> ) |                  |
|           | Thorax/Muscle          | Intestine | Intestine            | Intestine | Carcass/Fat body       | Carcass/Fat body |
| RpLP2     | 1630                   | 1797      | 2532                 | 2463      | 3360                   | 4238             |
| RpL21     | 1394                   | 1467      | 1503                 | 1631      | 2830                   | 2644             |
| RpLP1     | 1480                   | 1603      | 2065                 | 1682      | 2407                   | 2892             |
| RpS18     | 1154                   | 1136      | 1414                 | 1289      | 2014                   | 2250             |
| RpS3A     | 926                    | 796       | 746                  | 801       | 1890                   | 1763             |
| RpS30     | 834                    | 822       | 1174                 | 1088      | 1737                   | 1551             |
| RpL15     | 992                    | 897       | 1049                 | 971       | 1710                   | 1520             |
| RpL8      | 910                    | 1046      | 1287                 | 1075      | 1672                   | 2174             |
| RpS2      | 726                    | 823       | 1138                 | 989       | 1668                   | 2397             |
| RpL7      | 960                    | 990       | 1021                 | 934       | 1661                   | 1980             |
| Act5C     | 166                    | 281       | 1837                 | 2791      | 431                    | 537              |
| Gapdh1    | 514                    | 589       | 244                  | 223       | 609                    | 511              |
| Fer1HCH   | 446                    | 324       | 1510                 | 2400      | 501                    | 521              |
| Fer2LCH   | 423                    | 375       | 1461                 | 2235      | 457                    | 533              |

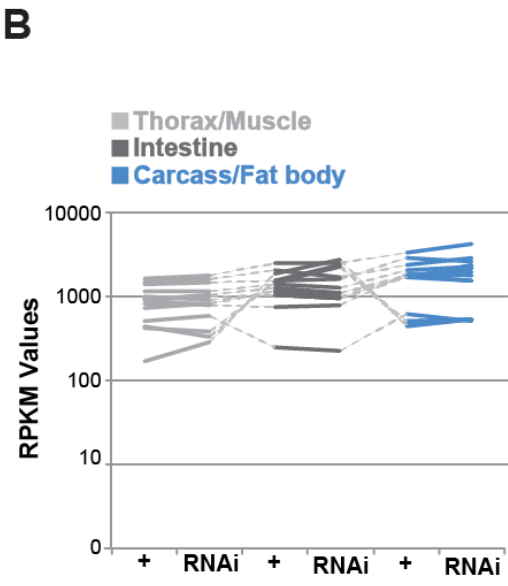

**C**

| Gene Name  | RPKM Values            |           |                  |
|------------|------------------------|-----------|------------------|
|            | Act88FG4>              |           |                  |
|            | + (w <sup>1118</sup> ) |           |                  |
|            | Thorax/Muscle          | Intestine | Carcass/Fat body |
| lambdaTry  | 0.695                  | 912.494   | 7.895            |
| kappaTry   | 0.177                  | 583.219   | 3.399            |
| zetaTry    | 0.291                  | 210.064   | 0.673            |
| etaTry     | 0.303                  | 278.554   | 1.259            |
| thetaTry   | 0.527                  | 978.901   | 1.764            |
| epsilonTry | 1.928                  | 6404.093  | 3.914            |
| iotaTry    | 0.607                  | 205.198   | 1.246            |
| Act88F     | 3392.774               | 1.395     | 3.345            |
| Mhc        | 154.197                | 5.902     | 35.761           |
| Mlp60A     | 105.035                | 12.171    | 14.122           |
| Mlc1       | 300.957                | 12.896    | 33.041           |
| Act57B     | 3048.743               | 69.562    | 327.471          |
| Mlc2       | 2282.070               | 43.285    | 102.399          |
| Lsd-1      | 155.302                | 23.908    | 587.738          |
| Jabba      | 52.987                 | 4.166     | 230.751          |
| FASN1      | 188.989                | 26.667    | 682.252          |
| FASN3      | 24.749                 | 1.194     | 249.969          |
| ACC        | 31.872                 | 9.581     | 111.805          |
| Fad2       | 110.730                | 12.418    | 1283.225         |
| EloF       | 43.842                 | 5.968     | 685.164          |
| CG16904    | 46.522                 | 6.898     | 607.852          |

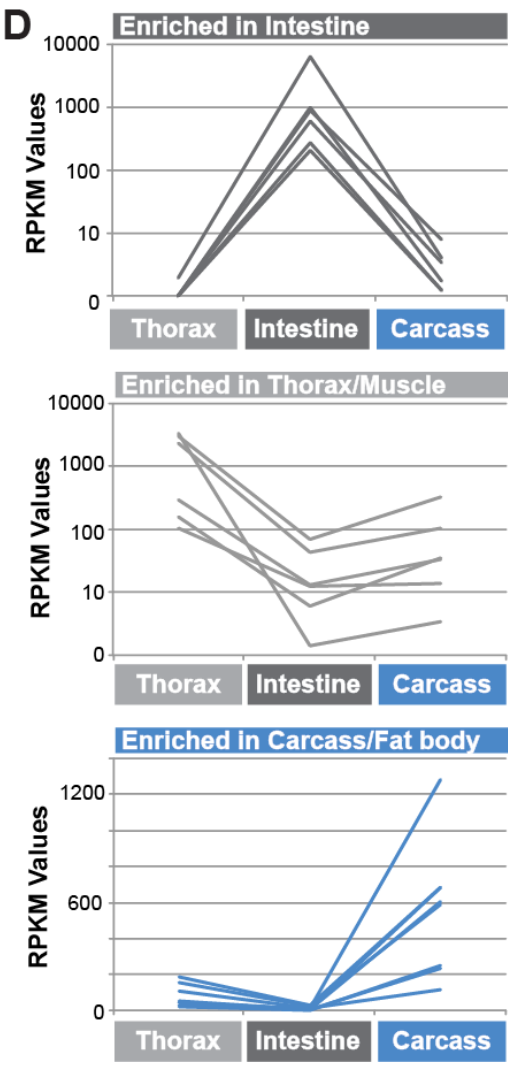



Figure S5

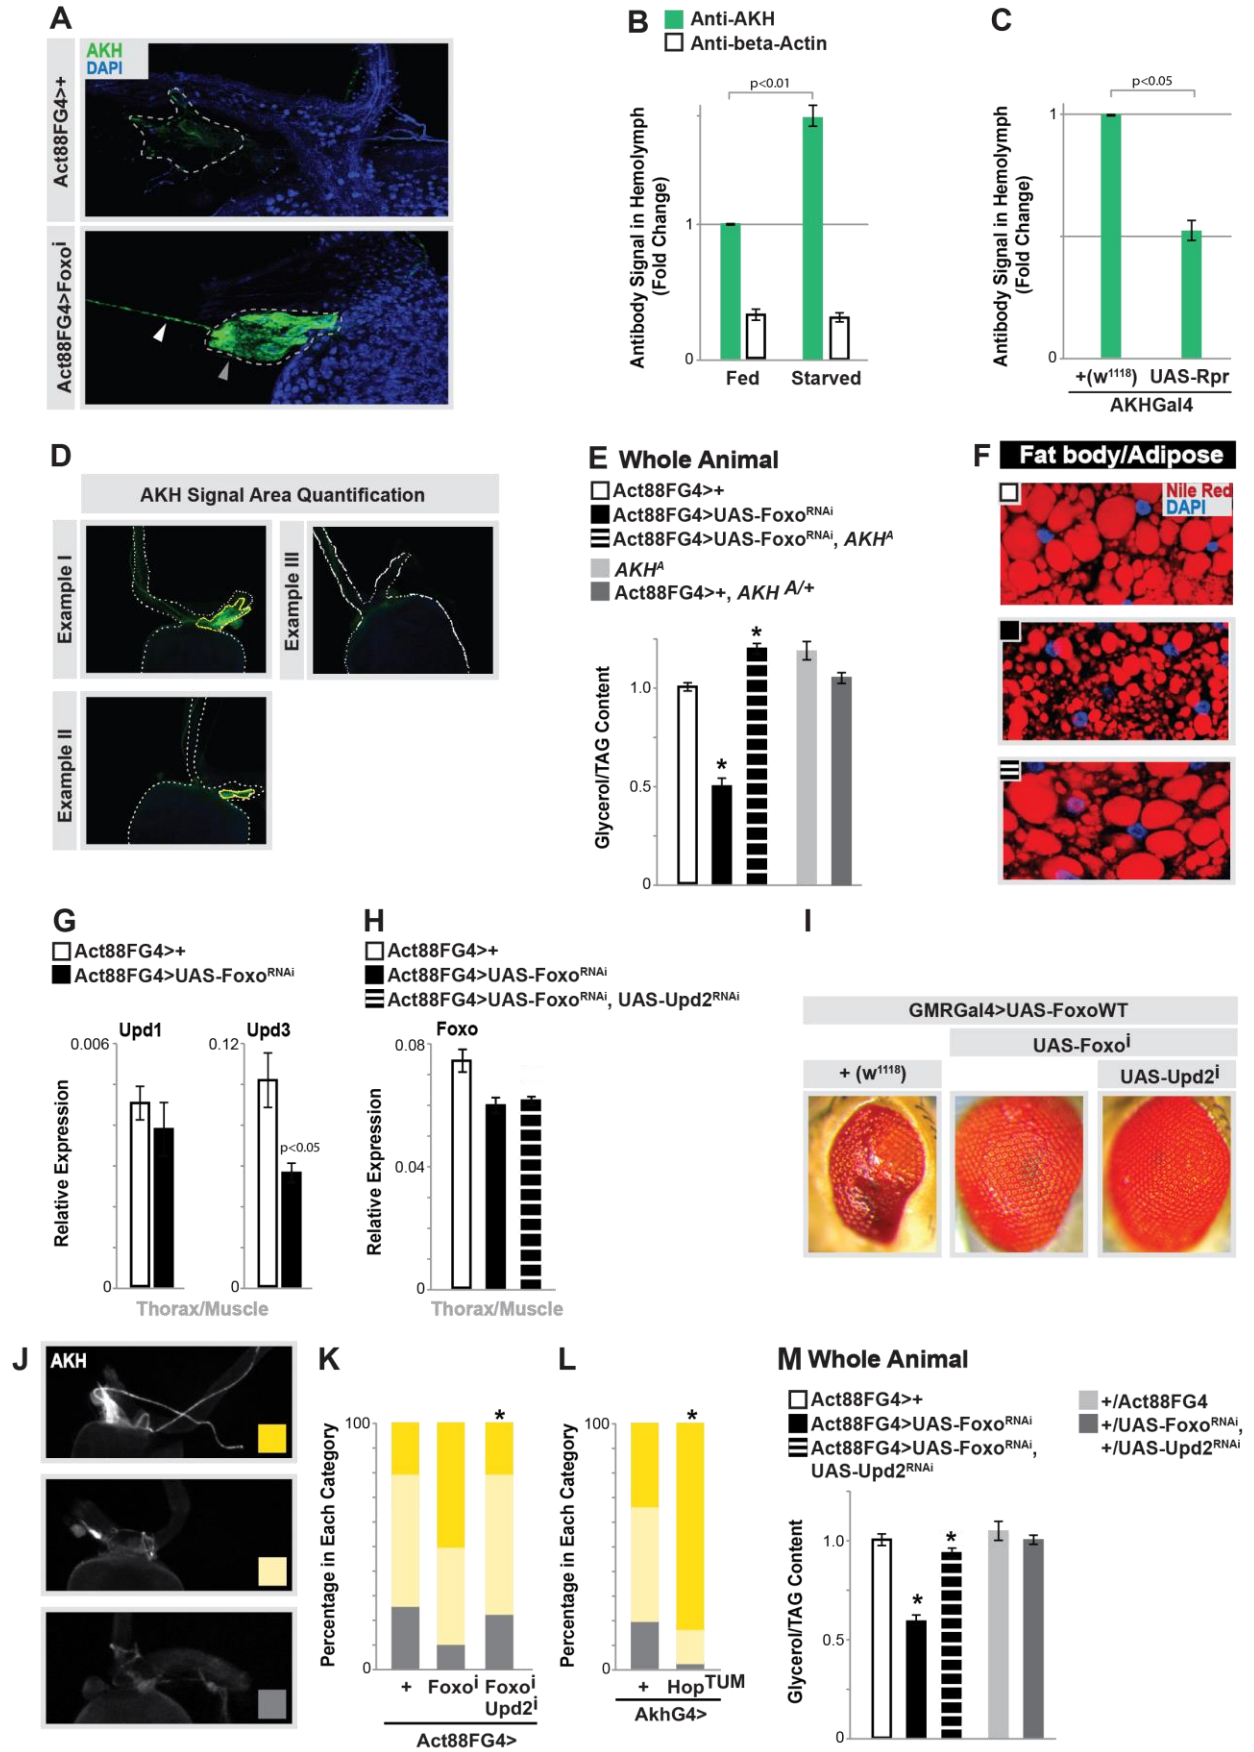

Figure S6

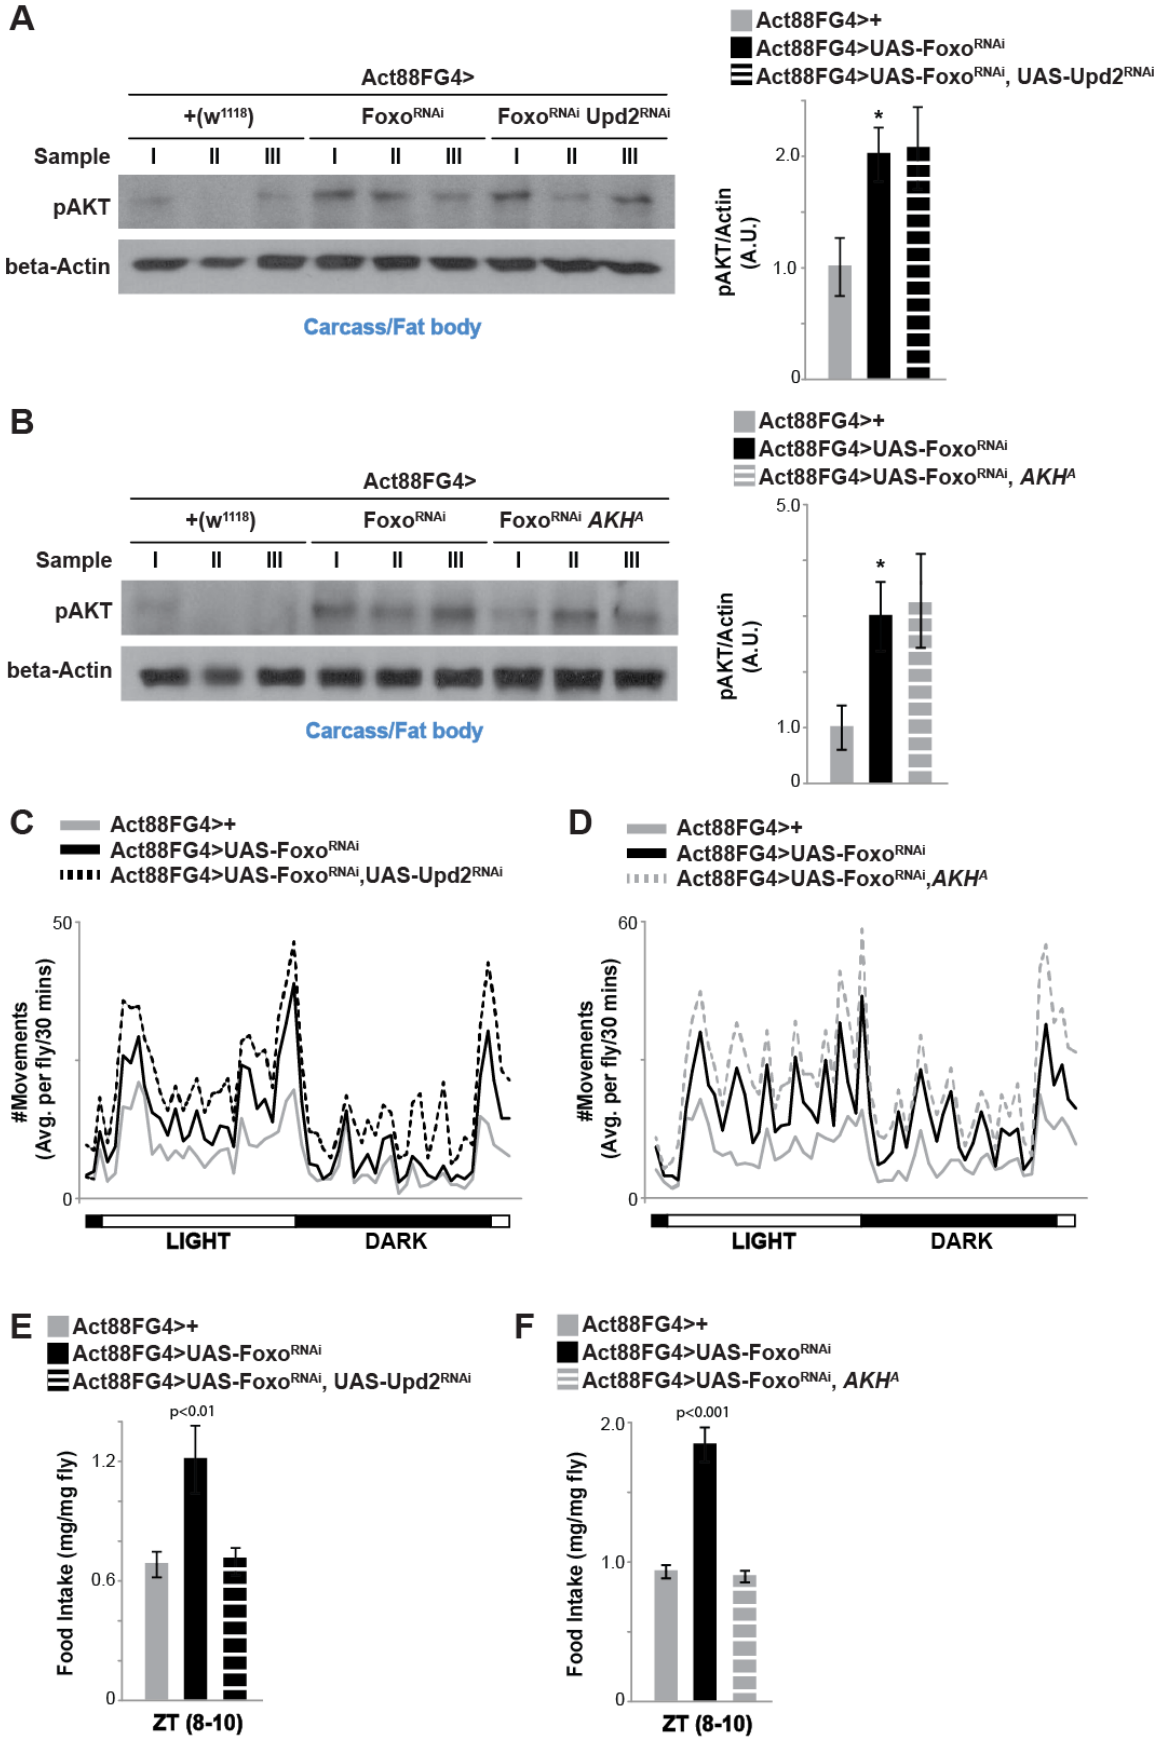

Figure S7

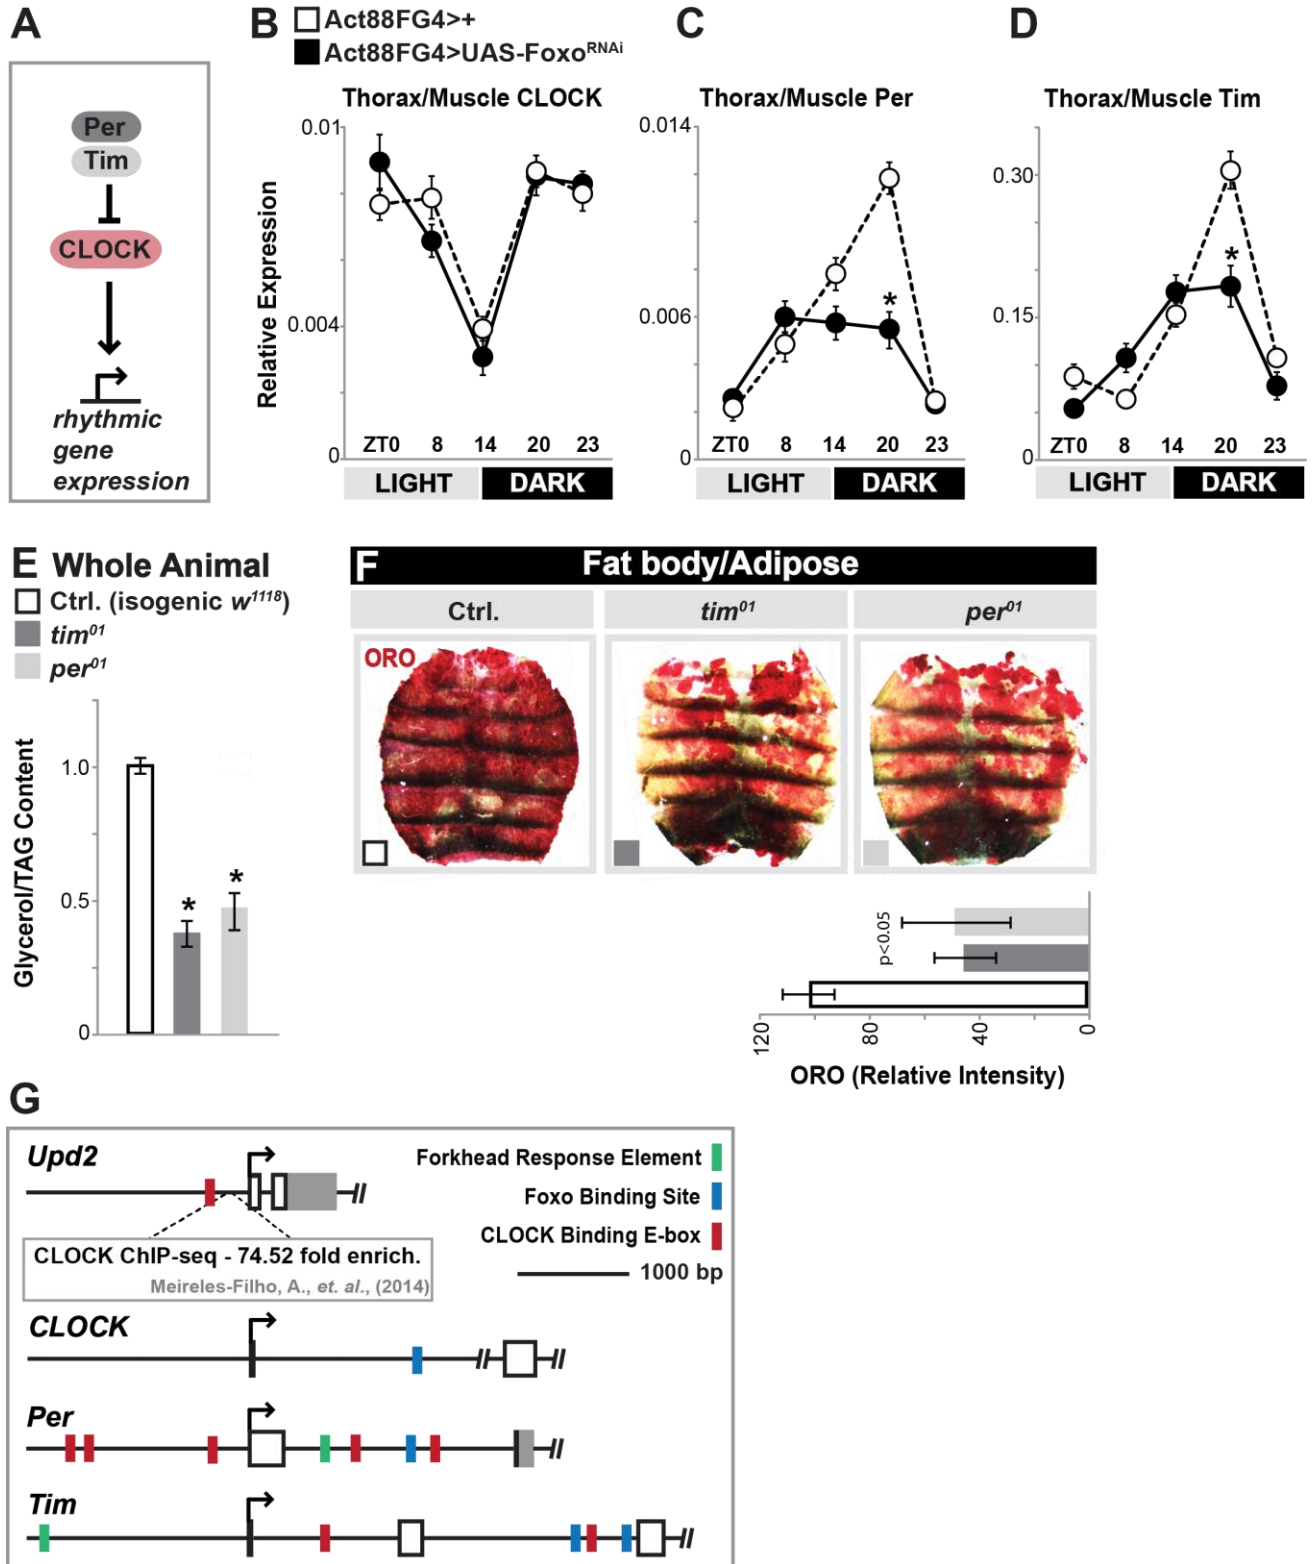

**Figure S1: Muscle-dependent changes in organismal lipid homeostasis. Related to Figure 1.**

(A) Lipid transport from fat body is required for neutral lipid storage in the thorax/muscle. Attenuating *Drosophila* lipoproteins *Lpp*; lipophorin and LTP; Lipid Transfer Particle; utilizing RNAi) in adult fat body (using the temperature sensitive driver *PplGal4, tubG80<sup>ts</sup>*; TARGET system) significantly decreases TAG levels in dissected thorax/muscle, but not the abdomen. n=5 samples.

(B) *Act88FGal4* driver specificity [S1]. *Act88FGal4* is active (utilizing *UAS-nlsGFP*) almost exclusively in the thoracic muscle, including the longitudinal indirect flight muscles (IFM), dorsal lateral muscles, dorsal ventral muscles, and weaker expression in leg muscles. GFP expression is also observed, although much weaker, in the muscle underlying the proboscis. No GFP expression is observed in any tissue in the carcass. Driver becomes active after development of thoracic muscle in late pupal stages.

(C) *Act88FGal4* is not active in the visceral muscle of the midgut (muscle nuclei marked by *vein-lacZ (vn-LacZ, white)*); actin filaments/muscle (*Phalloidin (Phall, red)*); and nuclei (*DAPI, blue*).

(D-F) Muscle-specific *Foxo* depletion in males leads to lipid metabolic deficits

(D) Starvation sensitivity of males upon *Foxo* depletion (RNAi line *v106097*) in muscle using *Act88FGal4*

(E) Total triglycerides (TAG) levels of whole males; n=5 samples.

(F) Oil red O (ORO) neutral lipid stain of male fat body.

(G-H) Immunostaining to detect lipid droplets (LD) in dissected longitudinal thoracic muscle (IFM) using a lipid droplet binding domain-GFP fusion protein (*UAS-LD-GFP*). The majority of LD-GFP marked LDs (green, forms ring around droplet) overlap with neutral lipid stain Nile red (red, see gray arrow as example). LD-GFP also marks muscle nuclei (*DAPI, blue*), which are negative for Nile red stain (white arrow). LD-GFP marked LDs also associate with mitochondria (H, mitochondria marked by *MitoTracker (red)*).

(I) LD-GFP marked LDs respond to increases in catabolic activity. Over-expressing *Drosophila Bmm* (homolog of ATGL, triglyceride lipase) in muscle results in drastic decreases in LD-GFP lipid droplets.

(J-M) *Foxo* depletion using *MHCGal4* phenocopies *Act88FGal4*

(J) Total triglycerides (TAG) levels of whole females upon *Foxo* depletion (RNAi line *v106097*) in muscle using *MHCGal4*; a ubiquitous, muscle specific driver. n=6 samples.

(K) Starvation sensitivity of female flies.

(L) Oil red O (ORO) neutral lipid stain of intestines.

(M) Nile red stain (for LD) of fat body; Nile red (red) and DAPI (blue) detected by immunostaining.

All bars represent mean±SE. Controls animals represent *PplGal4, tubG80<sup>ts</sup>>UAS-Luciferase<sup>RNAi</sup>*, *Act88FGal4>+(w<sup>1118</sup>)*, and *MHCGal4>+(w<sup>1118</sup>)*.



**Figure S2: Muscle-specific Foxo function is required to maintain systemic lipid homeostasis. Related to Figures 1 and 2.**

(A) Foxo RNAi efficiency. Over-expressing wild-type Foxo in the developing eye (GMRGal4>UAS-FoxoWT) results in an apoptotic phenotype (left panels). Inhibiting Foxo with RNAi transgene VDRC 106097 in the genetic background can completely rescue the apoptotic phenotype, while inhibiting Foxo with RNAi transgene TRiP HMS00793 (i(T)) partially rescues the apoptotic phenotype.

(B-D) Changes in lipid homeostasis upon muscle-specific depletion of Foxo (RNAi HMS00793)

(B) Total triglycerides (TAG) levels of whole females upon Foxo depletion (i(T)) in muscle using Act88FGal4. n=6 samples.

(C) Oil red O (ORO) neutral lipid stain of intestines. Intensity quantification of ORO, n=15 samples.

(D) ORO stain and Nile red stain (for LD) of fat body; Nile red (red) and DAPI (blue) detected by immunostaining. Intensity quantification of ORO, n=6 samples.

(E-G) UAS-FoxoRNAi transgene (v106097) alone does not affect lipid homeostasis. Total TAG levels of whole females (n=5 samples), as well as intestinal ORO stain (and quantification, n=12 samples), from UAS-FoxoRNAi/+(w<sup>1118</sup>) and +/(w<sup>1118</sup>) female siblings.

All bars represent mean±SE. All experiments represent female flies. Control animals for experiments with Act88FGal4>UAS-Foxo(i(T)) represent genetically matched Act88FGal4>UAS-LuciferaseRNAi.

**Figure S3: Behavioral, developmental, and insulin activity changes associated with muscle-specific depletion of Foxo. Related to Figures 1-4, 7.**

(A) Analysis of muscle structure upon Foxo depletion (RNAi line v106097) in muscle using Act88FGal4. Immunostaining of myofibrils from dissected longitudinal thoracic muscle (IFM). Phalloidin (Phall, green) stains actin filaments and actinin (red) stains Z-lines.

(B) Foxo depletion in muscle results in increased climbing ability. n=5 cohorts of 20 flies.

(C-D) Foxo depletion in muscle results in increased food intake. Act88FGal4>UAS-FoxoRNAi flies display increased food intake using both the Blue Dye feeding assay (C, n=6 cohorts of 5 flies) and the CAFE assay (D, n=8-10 samples). Note: Act88FGal4>UAS-FoxoRNAi flies only display a significant increase in intake (using the Blue Dye assay) in the light cycle (ZT(8-10), 8-10 hours after lights ON).

(E) Measurement of rhythmic activity upon muscle-specific depletion of Foxo. Each 30 min. time-point averaged represents 8-12 individual flies. Note: Act88FGal4>UAS-FoxoRNAi flies display similar rhythms compared to control flies, especially in regard to shifts in activity during light/dark cycle transitions. Act88FGal4>UAS-FoxoRNAi flies also display a trend (although not significant) of enhanced movements.

(F) No change in weight (n=13-16 samples) or size (length, representative images selected) of adult flies upon muscle-specific depletion of Foxo.

(G-H) Changes in lipid storage (Oil red O (ORO) neutral lipid stains) of intestines and fat bodies at Day 2, 5, and 10 post-eclosion (adulthood) upon muscle-specific depletion of Foxo. Intensity quantification of ORO, n=8-10 samples.

(I) *Drosophila* insulin-like peptides *dilp2*, *dilp3*, and *dilp5* transcription (measured by qRT-PCR) in dissected heads upon muscle-specific depletion of Foxo. n=4 samples

(J) pAKT (phosphor AKT) levels in dissected carcass/fat body upon muscle-specific depletion of Foxo; independent samples labeled I, II, and III. Quantification of three independent samples; A.U. – arbitrary units. Samples were taken at ZT(8-10).

All bars represent mean±SE. All experiments represent female flies. All control animals represent Act88FGal4>+(w<sup>1118</sup>).

#### **Figure S4: Unique tissue transcriptomes. Related to Figure 2.**

(A-B) RPKM values for select, basally high genes that show no change upon muscle-specific depletion of Foxo in all of the unique tissue transcriptomes (thorax/muscle; intestine; carcass/fat body). Plotted on graph (B); log scale; each line represents a unique gene.

(C-D) Tissue-specific gene expression of transcriptomes generated from dissected thorax/muscle, intestine, and carcass/fat body of control (Act88FGal4>+(w<sup>1118</sup>)). RPKM values for select genes (in which tissue-specificity has been previously characterized or identified) enriched in various dissected samples. RPKM values for all genes listed are given for all tissue-types; high RPKM values highlighted in red, and low RPKM values highlighted in green (red/green heat maps represent select groups of genes designated by dotted gray line). Genes enriched in the intestine (top group), thorax/muscle (middle group), and carcass/fat body (bottom group) are plotted on graphs (D); each line represents a unique gene. These data highlight the tissue-specificity of the various transcriptomes.

#### **Figure S5: AKH and Upd2 are required for muscle-dependent changes in systemic lipid homeostasis. Related to Figures 4-6.**

(A) Enhanced images displaying AKH immunostaining of corpora cardiaca (CC) cell bodies (gray arrow) and associated axons (white arrow); AKH (green) and DAPI (blue). General CC structure is outlined (dotted gray line). Anti-AKH signal is generally weak or absent in control flies (Act88FGal4>+(w<sup>1118</sup>)), and widespread in Act88FGal4>UAS-FoxoRNAi (RNAi line v106097) flies. Note: AKH immunostaining of axons did not always correlate with increased AKH immunostaining within CC cells.

(B) Quantification of anti-AKH signal in isolated hemolymph after acute starvation (16 hours) in control flies (Act88FGal4>+(w<sup>1118</sup>)) using EIA; fold change. Anti-beta-Actin was used as a negative control to confirm the absence of hemocytes (cells) in isolated hemolymph; fold change compared to Fed anti-AKH signal. n=4 samples.

(C) Quantification of anti-AKH signal in isolated hemolymph after ablation of AKH-producing cells (AKHGal4>UAS-Reaper(Rpr)) compared to control flies (AKHGal4>+(w<sup>1118</sup>)) using EIA; fold change. n=4 samples.

(D) Examples of sample images used to quantitate AKH signal area in CC using ImageJ. Anterior proventriculus and crop duct highlighted by dotted white line; CC and AKH signal (green) highlighted by yellow dotted line.

(E) Total triglycerides (TAG) levels of whole flies upon Foxo depletion in muscle (Act88Gal4) in various genetic backgrounds related to changes in AKH signaling. Values for Act88FGal4>+(w<sup>1118</sup>), Act88FGal4>UAS-FoxoRNAi, and Act88FGal4>UAS-FoxoRNAi; *AKH<sup>A</sup>* are identical to those presented in Fig. 4D. *AKH<sup>A</sup>* (independent mutant) and Act88FGal4>+(w<sup>1118</sup>), *AKH<sup>A</sup>* /+ represent additional controls. Note; *AKH<sup>A</sup>* mutants have elevated TAG levels compared to various controls, and Act88FGal4>UAS-FoxoRNAi; *AKH<sup>A</sup>* rescue TAG levels to similar levels. n=5 samples.

(F) Nile red stain (for LD) of fat body (nile red (red) and DAPI (blue) detected by immunostaining) in Act88FGal4>+(w<sup>1118</sup>) controls, Act88FGal4>UAS-FoxoRNAi, and Act88FGal4>UAS-FoxoRNAi; *AKH<sup>A</sup>* rescue flies.

(G) *upd1* and *upd3* transcription (measured by qRT-PCR) in dissected thorax/muscle upon muscle-specific depletion of Foxo, n=6 samples.

(H) *foxo* transcription (measured by qRT-PCR) in dissected thorax/muscle upon muscle-specific depletion of Foxo (Act88FGal4>UAS-FoxoRNAi) and concurrent depletion of Upd2 (Act88FGal4>UAS-FoxoRNAi, UAS-Upd2RNAi), n=6 samples.

(I) Foxo RNAi efficiency within the Upd2RNAi genetic background. Over-expressing wild-type Foxo in the developing eye (GMRGal4>UAS-FoxoWT) results in an apoptotic phenotype (left panels). Inhibiting Foxo with RNAi in the genetic background can completely rescue the apoptotic phenotype, even while concurrently inhibiting Upd2 with RNAi (UAS-Upd2RNAi).

(J-L) Quantification of corpora cardiaca (CC) AKH immunostain upon; (K) muscle-specific depletion of Foxo (Act88FGal4>UAS-FoxoRNAi) and rescue with concurrent depletion of Upd2 (Act88FGal4>UAS-FoxoRNAi, UAS-Upd2RNAi); and (L) upon over-activation of Hop (HopTumL) in CC AKH-producing cells (AKHGal4>UAS-HopTumL). n=10-15 samples; \*p-value<0.01.

(M) Total triglycerides (TAG) levels of whole flies upon Foxo depletion muscle (Act88Gal4) in various genetic backgrounds related to changes in Upd2 activity. Values for Act88FGal4>+(w<sup>1118</sup>), Act88FGal4>UAS-FoxoRNAi, and Act88FGal4>UAS-FoxoRNAi; UAS-Upd2RNAi are identical to those presented in Fig. 6A. +(w<sup>1118</sup>)/Act88FGal4 and +(w<sup>1118</sup>)/UAS-FoxoRNAi; +(w<sup>1118</sup>)/Upd2RNAi represent additional controls. n=5 samples.

All bars represent mean±SE. All experiments represent female flies except for panel I.

**Figure S6: Uncoupling hyperactivity, elevated insulin function, and hyperphagia from the Foxo/Upd2/AKH communication axis. Related to Figures 6-7.**

(A) pAKT (phospho AKT) levels in dissected carcass/fat body upon muscle-specific depletion of Foxo (Act88FGal4>UAS-FoxoRNAi) and with concurrent depletion of Upd2 (Act88FGal4>UAS-FoxoRNAi, UAS-Upd2RNAi); independent samples labeled I, II, and III. Attenuation of Upd2 does not rescue Foxo-mediated changes in insulin activity. NOTE: Control (Act88FGal4>+(w<sup>1118</sup>)) and Act88FGal4>UAS-FoxoRNAi samples are identical to those represented in Fig. S3. Right panel; Quantification of three independent samples, A.U.—arbitrary units. Samples were taken at ZT(8-10).

(B) pAKT (phospho AKT) levels in dissected carcass/fat body upon muscle-specific depletion of Foxo (Act88FGal4>UAS-FoxoRNAi) and with concurrent depletion of AKH (Act88FGal4>UAS-FoxoRNAi, *AKH<sup>A</sup>*); 3 of 5 independent samples shown, labeled I, II, and III. Attenuation of AKH does not rescue Foxo-mediated changes in insulin activity. Right panel; Quantification of five independent samples, A.U.—arbitrary units. Samples were taken at ZT(8-10).

(C) Measurement of rhythmic activity upon muscle-specific depletion of Foxo (Act88FGal4>UAS-FoxoRNAi) and with concurrent depletion of Upd2 (Act88FGal4>UAS-FoxoRNAi, UAS-Upd2RNAi). Each 30 min. time-point averaged represents 10-11 individual flies. Note: Both genotypes display similar rhythms compared to control flies, especially in regard to shifts in activity during light/dark cycle transitions. However, attenuation of Upd2 does not rescue Foxo-mediated changes in hyperactivity.

(D) Measurement of rhythmic activity upon muscle-specific depletion of Foxo (Act88FGal4>UAS-FoxoRNAi) and with concurrent depletion of AKH (Act88FGal4>UAS-FoxoRNAi, *AKH<sup>A</sup>*). Each 30 min. time-point averaged represents 10-11 individual flies. Attenuation of AKH does not rescue Foxo-mediated changes in hyperactivity.

(E-F) Act88FGal4>UAS-FoxoRNAi flies display increased food intake (using the Blue Dye feeding assay (n=5-6 cohorts of 5 flies)) that can be rescued with concurrent depletion of (E) Upd2 (Act88FGal4>UAS-FoxoRNAi, UAS-Upd2RNAi) or (F) AKH (Act88FGal4>UAS-FoxoRNAi, *AKH<sup>A</sup>*). Samples were taken in the light cycle at (ZT(8-10), 8-10 hours after lights ON). All bars represent mean±SE. All experiments represent female flies. All control animals represent Act88FGal4>+(w<sup>1118</sup>).

**Figure S7: Circadian control of the Foxo/Upd2/AKH communication axis. Related to Figure 7.**

(A) CLOCK (transcription factor) is an essential activator of circadian rhythmic gene expression. Per (period) and Tim (timeless) heterodimers (whose expression is regulated by CLOCK) inhibit CLOCK transcription factor DNA binding.

(B-D) Diurnal abundance of *CLOCK*, *per*, and *tim* transcription (measured by qRT-PCR) in dissected thorax/muscle from in Act88FGal4>+(w<sup>1118</sup>) control and Act88FGal4>FoxoRNAi flies. Note: CLOCK mRNA is regulated anti-phasic to Per and Tim mRNA. Muscle-specific Foxo depletion does not affect

diurnal abundance of *CLOCK*, but is required for rhythmic expression of *per* and *tim*. n=5 samples. \*p-value<0.01, designates ZT data point for Act88FGal4>FoxoRNAi is significantly changed compared to corresponding ZT data point for controls.

(E) Attenuation of total triglycerides (TAG) levels in timeless mutant (*tim<sup>01</sup>*) and period mutant (*per<sup>01</sup>*) flies; whole flies compared to isogenic (*w<sup>1118</sup>*) controls, n=5 samples.

(F) Attenuation of lipid storage (Oil red O (ORO) neutral lipid stains) in fat body of timeless mutant (*tim<sup>01</sup>*) and period mutant (*per<sup>01</sup>*) flies; compared to isogenic (*w<sup>1118</sup>*) controls. Intensity quantification of ORO, n=6-8 samples.

(G) Classical Foxo DNA binding motifs (Forkhead Response Elements and Foxo Binding Sites) are not present in the promoter of *Upd2*, but are present in promoter/enhancer regions of *CLOCK*, *Per*, and *Tim*. *CLOCK* binding E-box motif is present in the promoter of *Upd2*; via ChIP-Seq., *CLOCK* binding is over 70 fold enriched in the *Upd2* promoter [S2].



| <b>Primer</b> | <b>Sequence (5'-3')</b>   |
|---------------|---------------------------|
| ACC F         | CTATCGCTATGGTTACCTGCCGTA  |
| ACC R         | AACATGATCTGTGTGCCACCCAAC  |
| FASN1 F       | TGATGGCCGGTATTCTGGAAGAGA  |
| FASN1 R       | ATTGCTCATCAGCTCAGCGAACCT  |
| Yip2 F        | CGGTCTTAAGGGTGAGCAAG      |
| Yip2 R        | ACATTACGGGCAATGAAAGG      |
| Bmm F         | CAATAAGGGTCTGGCCAACCTGGAT |
| Bmm R         | TAAGTCCTCCACCATTACTCTGGC  |
| Mondo F       | CGCCTCTGAACGATAGGAAC      |
| Mondo R       | CTTCTGGAACCTGGAGGCAAG     |
| Thor F        | CACTTGCGGAAGGGAGTACG      |
| Thor R        | TAGCGAACAGCCAACGGTG       |
| Dilp2 F       | TCCACAGTGAAGTTGGCCC       |
| Dilp2 R       | AGATAATCGCGTCCGACCAGG     |
| Dilp3 F       | AATCCTTATGATCGGCGGTG      |
| Dilp3 R       | TACGTTCTCGGCTTGGCAG       |
| Dilp5 F       | GCTCCGTGATCCCAGTTCTC      |
| Dilp5 R       | GAGTCGCAGTATGCCCTCAAC     |
| Upd2 F        | CCACAACCTGCGACTCTTCT      |
| Upd2 R        | GCGCGGTGGGTTATATCTT       |
| Upd1F         | AATCAGCTGAAGCGCCACG       |
| Upd1 R        | GGAATTGGGCTTGAGCTTGG      |
| Upd3 F        | GCGGGGAGGATGTACC          |
| Upd3 R        | GTCTTCATGGAATGAGCC        |
| CLOCK F       | CAGTTCAACTCGCTGGTCAA      |
| CLOCK R       | ACCATCGAGAGACTCCAGCA      |
| Per F         | AACGGTTGCTACGTCTTCT       |
| Per R         | CGCTTCACGATATCCTCCTT      |
| Tim F         | AGTCGCCACTCACCATTCT       |
| Tim R         | TTCAGCTTGTTGCCGTTGT       |

**Table S1: Primer sequences used for qRT-PCR. Relates to Figures 2, 3, 5, 7, S3, S5, and S7.**

### **Supplemental References**

- S1. Nongthomba, U., Pasalodos-Sanchez, S., Clark, S., Clayton, J.D., and Sparrow, J.C. (2001). Expression and function of the *Drosophila* ACT88F actin isoform is not restricted to the indirect flight muscles. *J Muscle Res Cell Motil* 22, 111-119.
- S2. Meireles-Filho, A.C., Bardet, A.F., Yanez-Cuna, J.O., Stampfel, G., and Stark, A. (2014). cis-regulatory requirements for tissue-specific programs of the circadian clock. *Curr Biol* 24, 1-10.
